# Supplementary material for: Self-assembled rhomboidal ammonia monolayer confined in two vertically stacked graphene oxide/graphene nanosheets
Source: Royal Society of Chemistry journal article supplement (doi:10.1039/d1nr04062f), 2021-01-01
Supplement: d1nr04062f1.pdf [file d1nr04062f1.pdf]

## Electronic Supplementary Information

### Self-assembled rhomboidal ammonia monolayer confined in two vertically stacked graphene oxide/graphene nanosheets

Zhi-Bin Jian,<sup>a</sup> Jie Bie<sup>ab</sup> and Shuang Chen<sup>a\*</sup>

<sup>a</sup>Kuang Yaming Honors School and Institute for Brain Sciences, Nanjing University,  
Nanjing, Jiangsu 210023, China

<sup>b</sup>National Laboratory of Solid State Microstructures and Department of Physics, Nanjing  
University, Nanjing, Jiangsu 210093, China

E-mail: [chenshuang@nju.edu.cn](mailto:chenshuang@nju.edu.cn)

## S1. Building of computational slab models

In order to locate possible  $\text{NH}_3$  phases confined in two packed graphene oxide (GO)/graphene (G) nanosheets, three  $\text{NH}_3\text{s@GO}$  model systems are constructed in consideration of various oxygen-containing groups in two-dimensional (2D) GO nanosheets, and one  $\text{NH}_3\text{s@G}$  model system is also built for comparison. In these model systems, only  $\text{NH}_3$  monolayers are deposited into two confining planes. The oxygen-containing functional groups in GO sheets are diverse, and their components and contents which significantly depend on the synthetic methods are difficult to be determined.<sup>S1</sup> The previous experimental observation has predicted that the main oxygen-containing functional groups of GO are hydroxyl, epoxy, ether, and carbonyl in the basal plane and hydroxyl and carboxyl at the edge.<sup>S1, S2</sup> Herein, we refer to the experimental observation and then build three GO monolayers including the hydroxyl/carbonyl-, epoxy-, and ether-functionalized ones in **Fig. S1a-c** respectively. And we also take the pure graphene layer without oxygen-containing groups as a model system in **Fig. S1d**. Among these GO monolayers, the  $sp^2$ -carbon skeleton of hydroxyl/carbonyl-functionalized GO is seriously destroyed due to introduction of hydroxyl and carbonyl groups, but this monolayer may greatly approach to the real one. These hydrophilic and hydrophobic GO/G monolayers are vertically stacked to confine  $\text{NH}_3$  monolayers to generate our studied slab models of  $\text{NH}_3\text{s@GO/G}$  with a  $c$ -axis length of 60 Å to ensure the thick-enough vacuum layer of about 50 Å, also in sufficient consideration of size match between 2D confining planes and  $\text{NH}_3$  monolayer. The corresponding lattice parameters are summarized in **Table S1**. For four kinds of slab models, their  $a$ -axis lengths range from 7.13 Å to 9.92 Å and their  $b$ -axis lengths changes from 8.52 Å to 10.8 Å. Although these lattice lengths in 2D planes change a lot because of introducing various O-bearing functional groups or not, the  $\text{NH}_3$  molecules are deposited into these side-different four GO/G bilayers to form a monolayer with molecular number fixed referring to the density of solid  $\text{NH}_3$ <sup>S3</sup> so that the surface densities of  $\text{NH}_3$  monolayers in different models vary from 0.075 to 0.13 Å<sup>-2</sup>. Noticeably, their

oxygen-containing groups of GO bilayers are set to point to the filled  $\text{NH}_3$  molecules. For the confined  $\text{NH}_3$  molecules, two cases, ordered and amorphous  $\text{NH}_3$  monolayers, are considered for their initial configurations. The ordered  $\text{NH}_3$  monolayer as mentioned above refers to the crystal structure of solid  $\text{NH}_3$ ,<sup>S3</sup> since the crystal structure of liquid  $\text{NH}_3$  is quite close to that of solid  $\text{NH}_3$ , only with a little longer lattice constants.<sup>S4</sup> The interlayer space of each  $\text{NH}_3\text{s@GO/G}$  is set to be large enough to let each  $\text{NH}_3$  monolayer relax into its possible solid or liquid phases in our first-principles geometry optimization. For comparison, the amorphous  $\text{NH}_3$  monolayer is also built just referring to the same surface density. In our first-principles calculations, we only take the amorphous  $\text{NH}_3$  monolayer in ether-functionalized GO bilayer (**Fig. S2**) as an example to text the influence of initial configurations of  $\text{NH}_3$  monolayers on formation of possible final configurations. Finally, the strain effect on the phase transition of  $\text{NH}_3$  monolayer confined in vertically stacked ether-functionalized GO bilayer is investigated by only changing the interlayer spacing of two GO sheets.

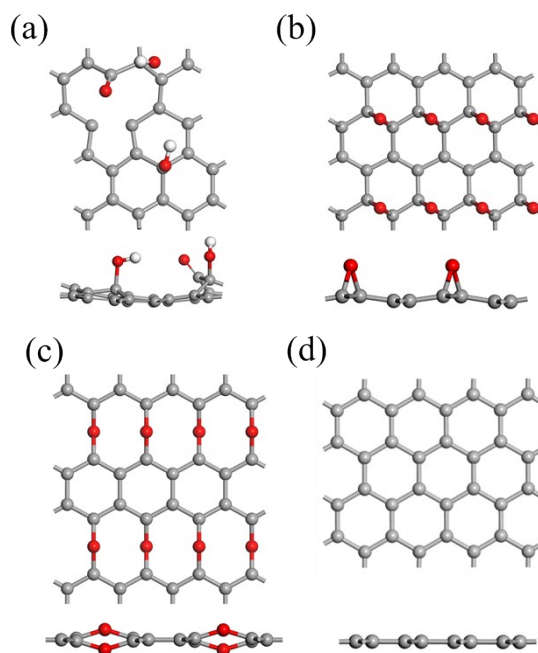

**Figure S1.** Optimized structures (both top and side views) of 2D (a-c) graphene oxide and (d) graphene monolayers based on the first-principles calculations. The graphene oxide monolayers include (a) hydroxyl/carbonyl-, (b) epoxy-, and (c) ether-functionalized ones.

**Table S1.** Computational supercell volumes and surface densities of four NH<sub>3</sub>@GO/G models.

| Model                                                | Supercell Volume (Å <sup>3</sup> ) | Surface Density (Å <sup>-2</sup> ) |
|------------------------------------------------------|------------------------------------|------------------------------------|
| <b>The First-principles Calculations</b>             |                                    |                                    |
| NH <sub>3</sub> @hydroxyl/carbonyl-functionalized GO | 7.13×8.61×60                       | 0.13                               |
| NH <sub>3</sub> @epoxy-functionalized GO             | 9.84×8.52×60                       | 0.095                              |
| NH <sub>3</sub> @ether-functionalized GO             | 9.92×10.8×60                       | 0.075                              |
| NH <sub>3</sub> @G                                   | 9.84×8.52×60                       | 0.095                              |
| <b>AIMD Simulation</b>                               |                                    |                                    |
| NH <sub>3</sub> @ether-functionalized GO             | 14.82×16.19×60                     | 0.075                              |

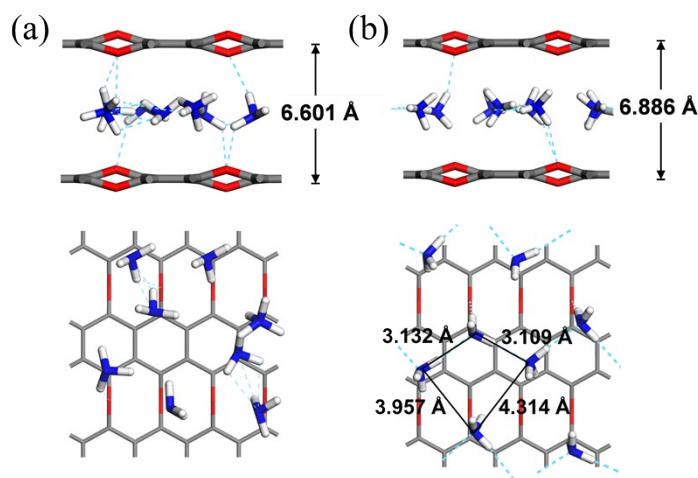

**Figure S2.** Structures of amorphous NH<sub>3</sub> monolayer confined in two vertically stacked ether-functionalized GO nanosheets for its both side-view and top-view (a) initial structures and (b) optimized structures.

## **S2. Zigzag hydrogen bonding in NH<sub>3</sub> monolayer highlighted by using Electron Localization Function (ELF) analysis**

Taking NH<sub>3</sub>s@ether-functionized GO as a benchmark, the NH<sub>3</sub> monolayer is taken from this benchmark system to estimate its charge density based on the first-principles calculations. Then learning from this charge density results, the ELF analysis<sup>S5</sup> is further performed to highlight hydrogen bonding within this confined NH<sub>3</sub> monolayer (Fig. S3). The possibility of finding a pair of electrons at certain position is colored on a blue-green-red scale according to values ranging from 0 to 1 to reflect the bonding nature of materials, where blue (0) indicates a delocalized electron pair, red (1) indicates a localized electron pair for bonding, and green (0.5) can be viewed as a delocalized one and a localized one for nonbonding. As shown in Fig. S3, the N atom of each NH<sub>3</sub> molecule in this monolayer is located at the center of the green region and also colored in green. Two round red spots with outermost yellow circles indicate two H atoms covalently bonding with N atom. Noticeably, the third bonded H atom is covered by the top H atoms because of Y configuration. The other red spots with yellow outer ring in an irregular shape represents the lone pair electrons of N atom. According to this ELF picture, we can recognize one N-H bond of a NH<sub>3</sub> molecule in this (001) surface faces to the lone pair electrons of N atom of the neighboring NH<sub>3</sub> molecule to form a hydrogen bond. Because of sp<sup>3</sup> hybridization of N atom that determines the spatial distribution of lone pair electrons and bonding electrons of each NH<sub>3</sub> molecule, these neighboring NH<sub>3</sub> molecules form the zigzag hydrogen bonding alignment in the confined NH<sub>3</sub> monolayer finally highlighted by this ELF picture.

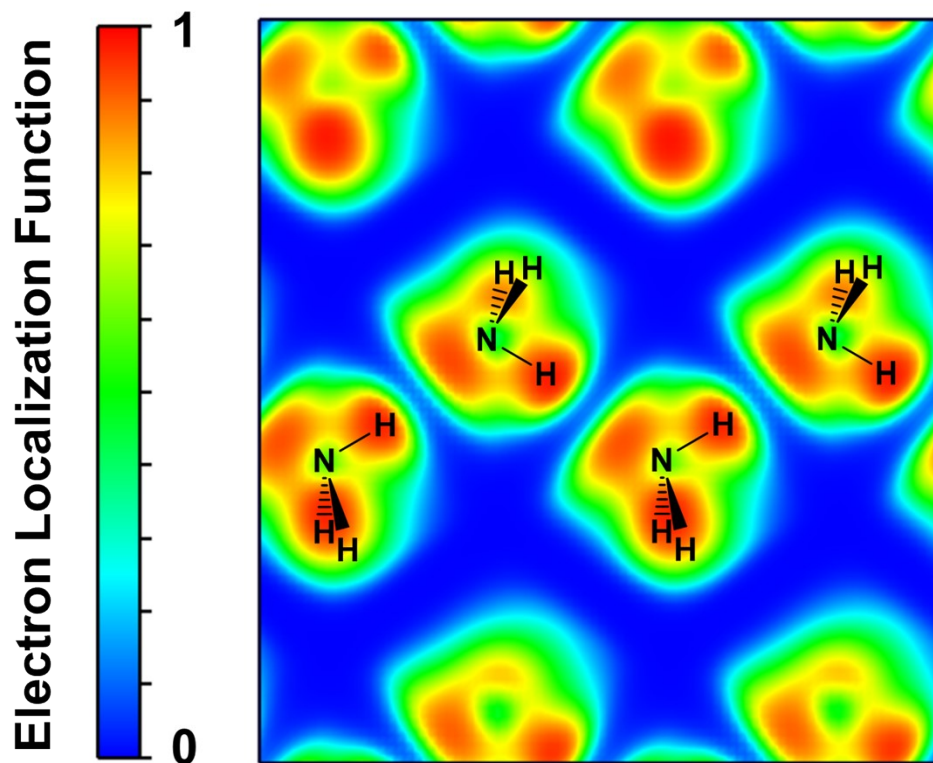

**Figure S3.** ELF analysis of  $\text{NH}_3$  monolayer taken from  $\text{NH}_3\text{s@ether}$ -functionalized GO viewed along (001) surface.  $\text{NH}_3$  molecules are highlighted to distinguish the bonding nature. A color-bar is given to present ELF values.

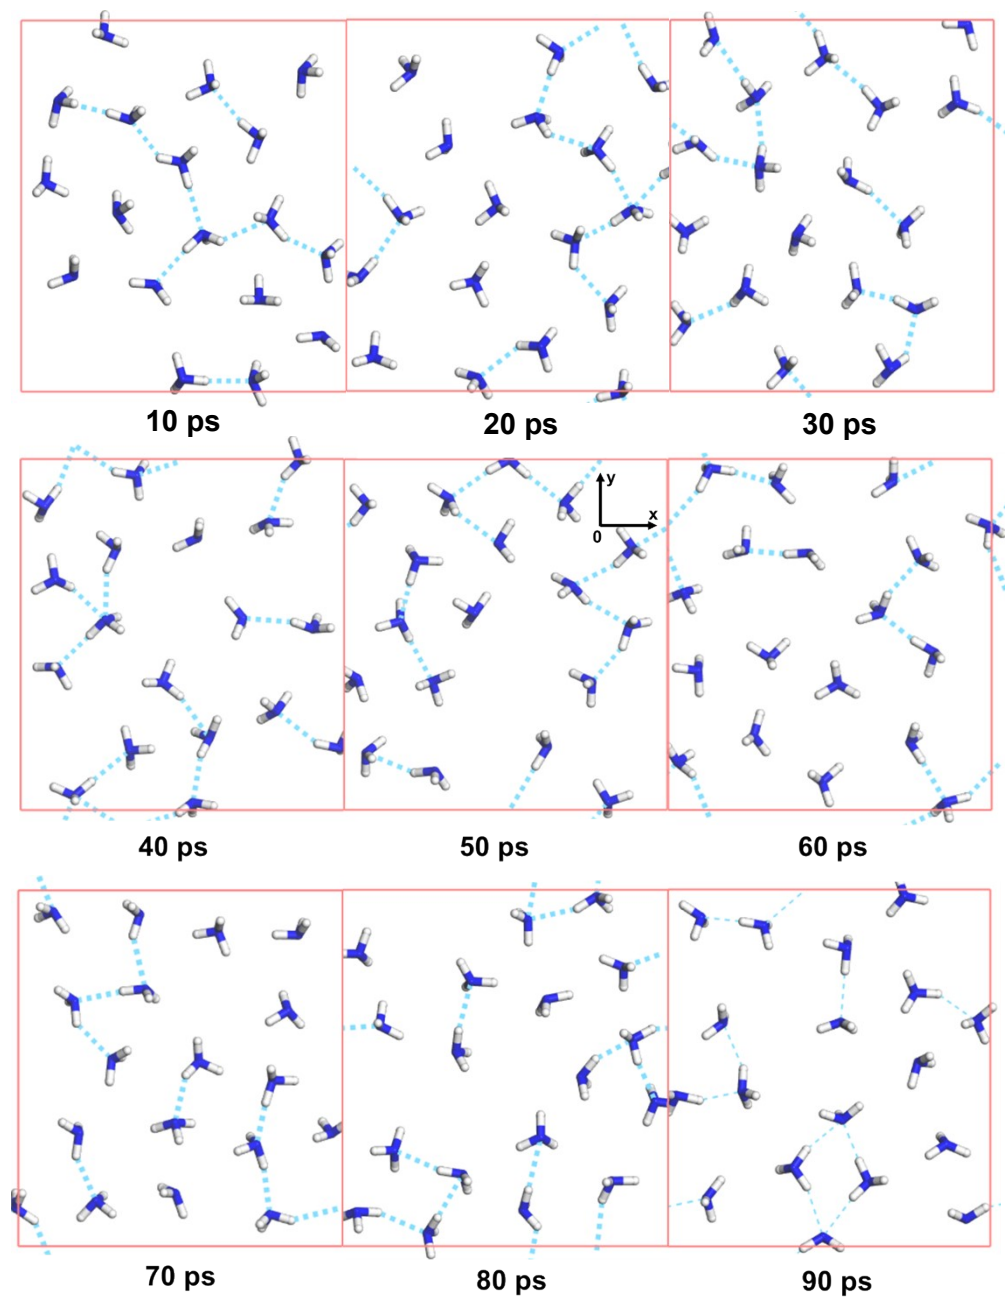

**Figure S4.** Selected snapshots of NH<sub>3</sub>@ether-functionalized GO learning from the trajectory of its AIMD simulation. The surface axes ( $x$  and  $y$ ) in 2D plane are also highlighted in insets.

### **S3. Choice of London dispersion corrections in density function theory (DFT) calculations for our studied systems**

We know DFT-D3 is an update of DFT-D2, and it is now the most widely used DFT-D method since it has refined regarding higher accuracy, broader range of applicability, and less empiricism compared to DFT-D2.<sup>S6</sup> In our first-principles calculations and AIMD simulations, the D3 London dispersion corrections combined with the PBE functional is chosen to well consider intermolecular interactions in our studied systems, NH<sub>3</sub> molecules confined in two GO/G nanosheets. Here, we still make a comparison between PBE-D3 and PBE-D2 functionals by taking geometry optimization of NH<sub>3</sub>s@ether-functionalized GO as an example. As shown in Table S2, this geometry optimization comparison starts from the same initial structure. After geometry optimization, the structural parameters of the example system calculated based on PBE-D2 are a little different from those calculated based on PBE-D3. Both functionals predict a rhomboidal NH<sub>3</sub> monolayer with Y-shape molecules. The corresponding side lengths of 2D lattices calculated by using PBD-D3 and PBE-D2 are nearly the same with a little difference not larger than 0.068 Å. But the interlayer spaces are quite different. The one predicted by PBE-D2 is 1.23 Å smaller than that predicted by PBE-D3.



**Table S2.** Optimized structures of  $\text{NH}_3\text{@ether}$ -functionalized GO with structural parameters calculated based on (a) PBE-D3 or (b) PBE-D2 functionals in the first-principles calculations for comparison.

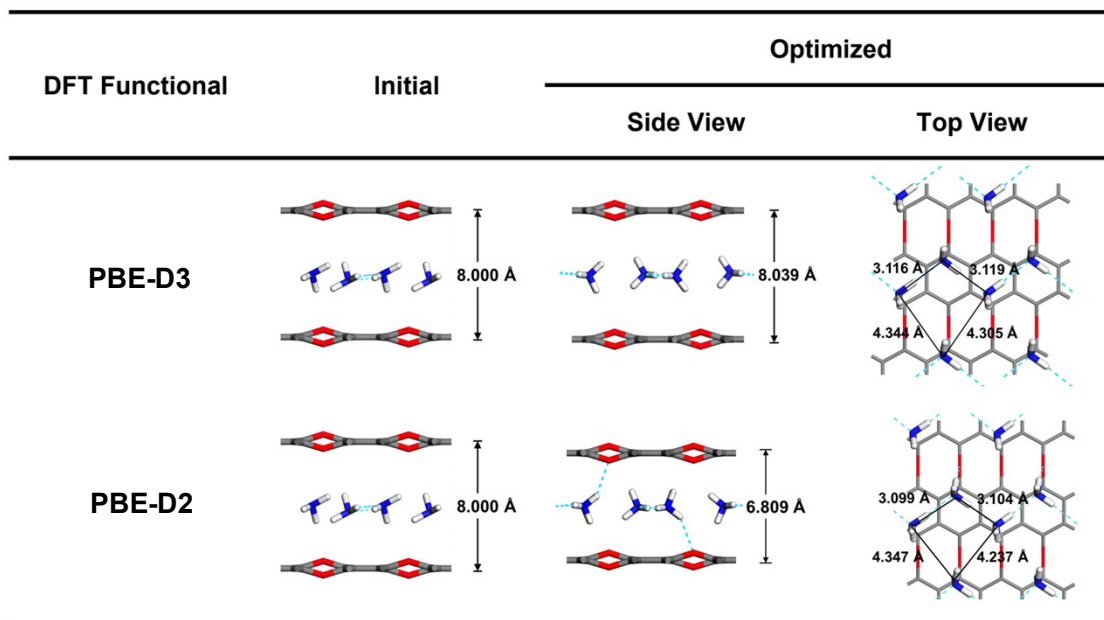

#### S4. Choice of $k$ points

In our first-principles calculations and AIMD simulations, the  $\Gamma$  point is used in consideration of computational consuming. We take  $\text{NH}_3$ @ether-functionalized GO as an example to test choice of  $k$  points. As shown in Table S3, this geometry optimization comparison starts from the same initial structure. After geometry optimization, the structural parameters of the example system calculated by using the  $k$  mesh of  $4 \times 4 \times 1$  are a little different from those calculated by using the  $\Gamma$  point. Both calculations by using different  $k$  points predict a rhomboidal  $\text{NH}_3$  monolayer with Y-shape molecules. The corresponding side lengths of 2D lattices calculated by using  $\Gamma$  point and the  $k$  mesh of  $4 \times 4 \times 1$  are nearly the same with a little difference not larger than  $0.093 \text{ \AA}$ . But the interlayer spaces are quite different. The one predicted by  $\Gamma$  point is  $0.98 \text{ \AA}$  larger than that predicted by the  $k$  mesh of  $4 \times 4 \times 1$ . We think this choice is economic and accurate.

**Table S3.** Optimized structures of  $\text{NH}_3$ @ether-functionalized GO with structural parameters calculated by  $\Gamma$  point and a  $k$  mesh of  $4 \times 4 \times 1$  for comparison.

| K Points              | Initial | Optimized |          |
|-----------------------|---------|-----------|----------|
|                       |         | Side View | Top View |
| $\Gamma$              |         |           |          |
| $4 \times 4 \times 1$ |         |           |          |

### Supplementary references

- S1. W. Gao, L. B. Alemany, L. Ci and P. M. Ajayan, *Nat. Chem.*, 2009, **1**, 403-408.
- S2. T. Szabó, O. Berkesi, P. Forgó, K. Josepovits and I. Dékány, *Chem. Mater.*, 2006, **18**, 2740-2749.
- S3. I. Iovsson and D. H. Templeton, *Acta Cryst.*, 1959, **12**, 832–836.
- S4. W. L. Jorgensen and M. Ibrahim, *J. Am. Chem. Soc.*, 1980, **102**, 3309-3315.
- S5. A. D. Becke and K. E. Edgecombe, *J. Chem. Phys.*, 1990, **92**, 5397-5403.
- S6. S. Grimme, *WIREs Comput. Mol. Sci.*, 2011, **1**, 211-228.
